# Supplementary material
Source: PubMed Central journal article supplement (PMC6093242)
Supplement: supp_RA118.002443_136043_2_supp_155311_pyyyyy.pdf [file supp_RA118.002443_136043_2_supp_155311_pyyyyy.pdf]

## **SUPPORTING INFORMATION**

### **Loading of malonyl-CoA onto tandem acetyl carrier protein domains of polyunsaturated fatty acid synthases**

Omar Santín and Gabriel Moncalián

Material included: Supplementary Figures S1 to S9



**Figure S1. Multiple sequence alignment of KS-AT domains.** Alignment of representative KS-AT protein regions from Pfa and FAS systems. Sequences correspond to PfaA (mmKSAT) from *Moritella marina* (Acc. no. Q9RA21), PfaA (Cp\_KSAT) from *Colwellia psychrerythraea* (Acc. no. Q47ZG8), PfaA (SbKSAT) from *Shewanella baltica* (Acc. no. A9KUH8), PFA1 (SchKSAT) from *Schizochytrium* ATCC 20888 (Acc. no. AAK72879), pfa2 (SoceKSAT) from *Sorangium cellulosum* (Acc. no. A9EPF7) and mFAS (SscrKSAT) from *Sus scrofa* (Acc. no. A5YV76). Identical residues are shown in white on a red background, while similar residues are shown in red. The unstructured loop that connects both domains is marked with a green line. The positions of the catalytic residues of both domains have been marked with black (KS) and blue (AT) arrows, respectively.





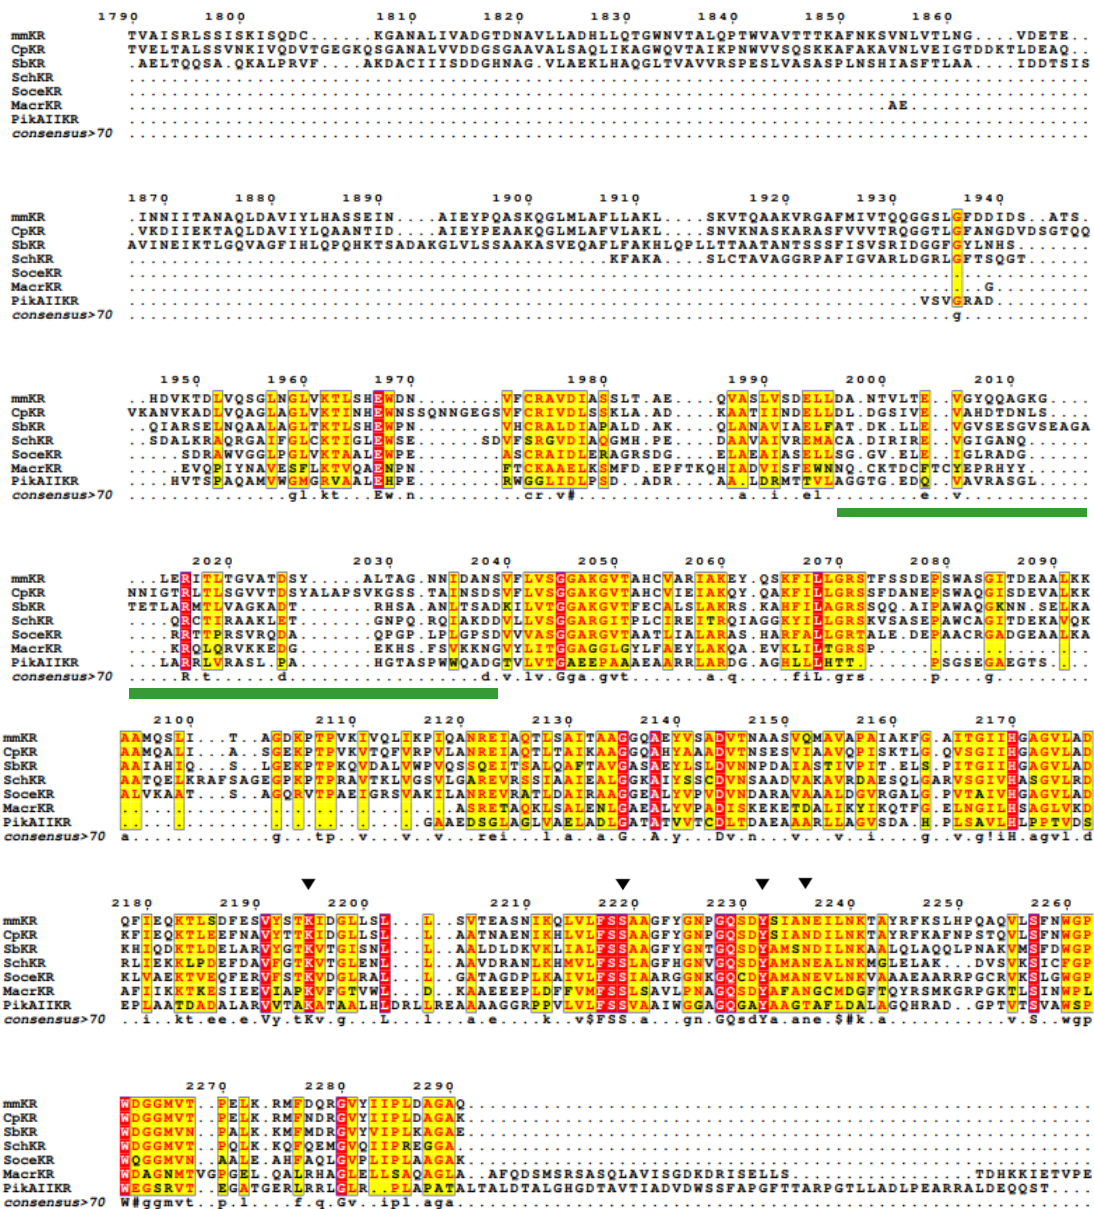

**Figure S3 Multiple sequence alignment of KR'-KR domains.** Alignment of representative KR'-KR protein regions from Pfa and PKS system. Sequences correspond to PfaA (mmKR) from *Moritella marina* (Acc. no. Q9RA21), PfaA (CpKR) from *Colwellia psychrerythraea* (Acc. no. Q47ZG8), PfaA (SbKR) from *Shewanella baltica* (Acc. no. A9KUH8), PFA1 (SchKR) from *Schizochytrium* ATCC 20888 (Acc. no. AAK72879), Macrolactin PKS (MacrKR) from *Bacillus amyloliquefaciens* (Acc. no. Q1RS63) and PikII module (PikAIIKR) from *Streptomyces venezuelae* (Acc. no. Q9ZGI4). Identical residues are shown in white on a red background, while similar residues are shown in red. The unstructured loop that connect both KR domains was marked with a green line. The positions of the catalytic residues of the KR domains have been marked with black arrows.

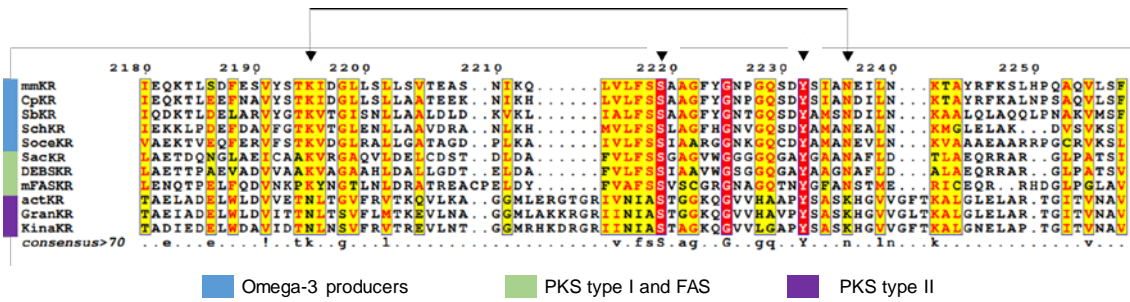

**Figure S4. Multiple sequence alignment showing the swapped KR K/N residues within PfaA homologous proteins.** The alignment of the KR active site region responsible for catalysis in omega-3 synthases in comparison with PKS and FAS systems is shown. Sequences correspond to PfaA (mmKR) from *Moritella marina* (Acc. no. Q9RA21), PfaA (CpKR) from *Colwellia psychrerythraea* (Acc. no. Q47ZG8), PfaA (SbKR) from *Shewanella baltica* (Acc. no. A9KUH8), PFA1 (SchKR) from *Schizochytrium* ATCC 20888 (Acc. no. AAK72879), Pfa2 (SoceKR) from *Sorangium cellulosum* (Acc. no. A9EPF7), SpnC PKS (SackKR) from *Saccharopolyspora spinosa* (Acc. no. Q9ALM4), DEBS (DEBSKR) from *Streptomyces hygrosopicus* (Acc. no. AQW50878), mammalian FAS (mFASKR) from *Sus scrofa* (Acc. no. A5YV76), Actinorhodin PKS (actKR) from *Streptomyces coelicolor* (Acc. no. P16544), Granaticin PKS (GranKR) from *Streptomyces violaceoruber* (Acc. no. P16542) and Kinamycin PKS (KinaKR) from *Streptomyces sp. ERV7* (Acc. no. AAO65349). Identical residues are shown in white on a red background, while similar residues are shown in red. The position of the catalytic motifs is marked with black stars, and K/N swapping is represented with two arrows connecting both residues.



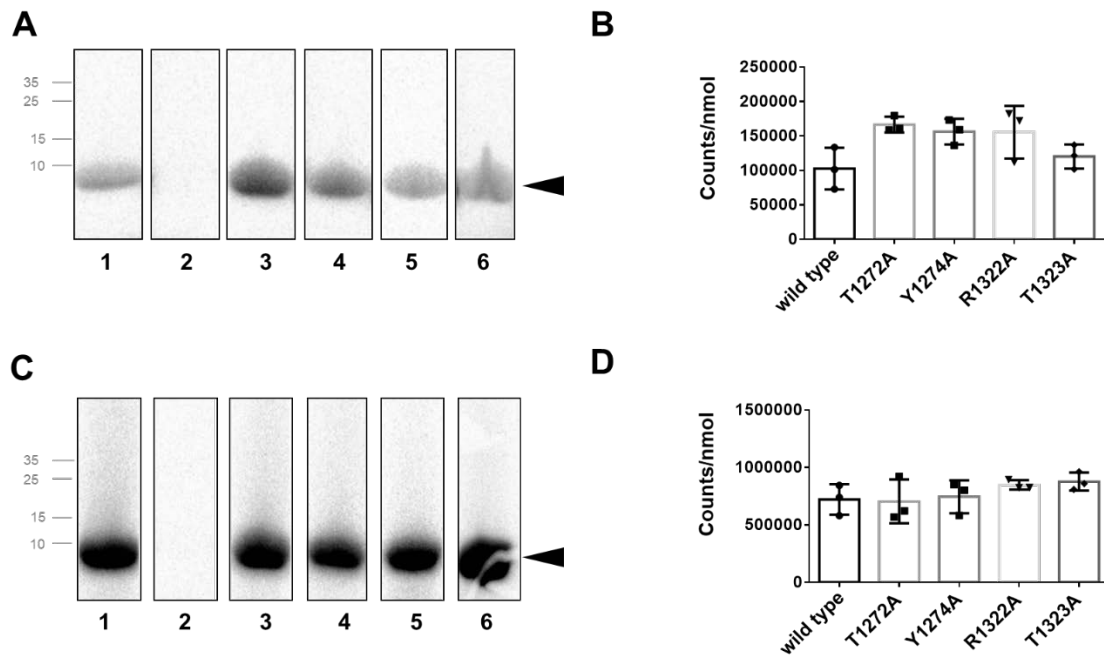

**Figure S6. Alanine substitution screening for mmACP1.** (A) Wild type mmACP1, the apo ACP form and the four mutants incubated with radiolabeled [14C]-malonyl-CoA analyzed by radio-SDS-PAGE. Lane 1: holo-mmACP1+Malonyl-CoA; 2: apo-mmACP1+Malonyl-CoA 3: holo-mmACP1(T1272A)+Malonyl-CoA; 4: holo-mmACP1(Y1274A)+Malonyl-CoA; 5: holo-mmACP1(R1322A)+Malonyl-CoA; 6: holo-mmACP1(T1323A)+Malonyl-CoA. (B) Quantification of the protein bands intensities of mmACP1 wild type and the mutants analyzed in A by densitometric scanning, normalized with molarity of each sample. (C) and (D) correspond to the same protein samples but incubated with mmKS-AT. Black arrows indicate the theoretical mmACP1 molecular weight.



# A

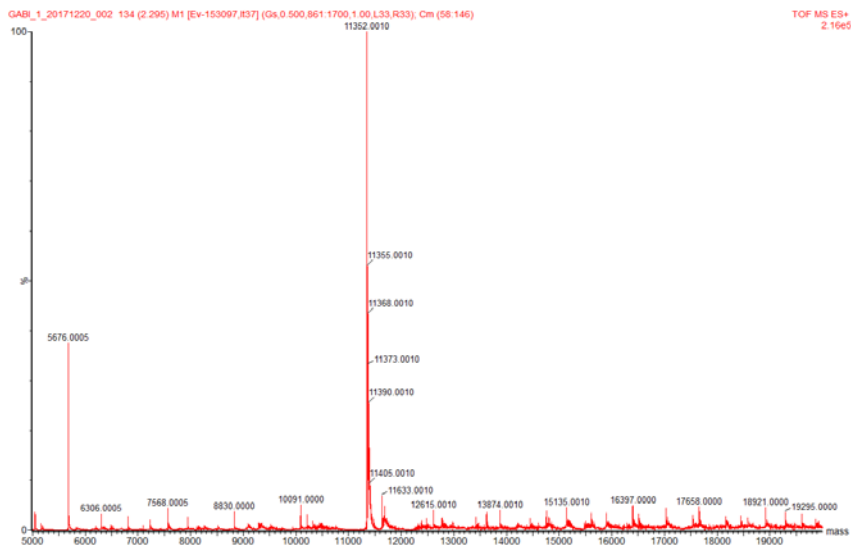

apoACP

# B

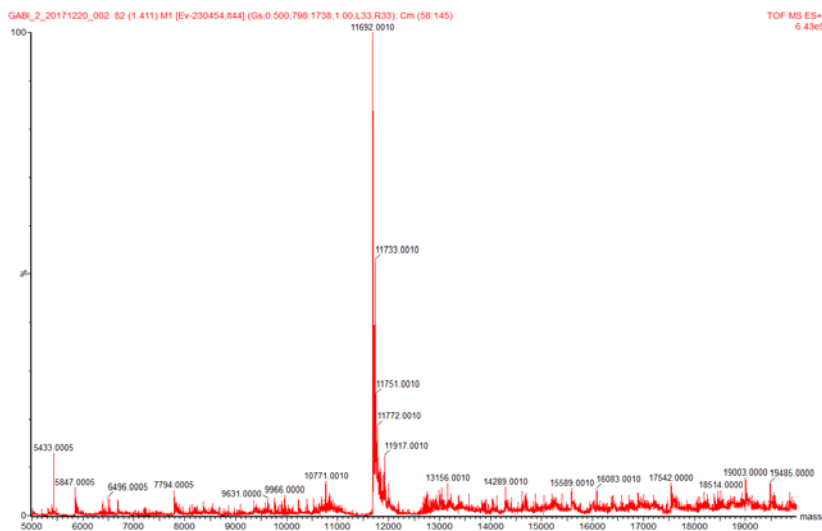

holoACP

**Figure S7. High Definition Mass Spectrometry.** High definition mass spectra of apo mmACP1 (A) and holo mmACP1 (B). The amount of desalted protein used for both experiments was 40  $\mu\text{g}$ . MS spectra were manually acquired in the  $m/z$  range 500-1700. Default deconvolution parameters were used.

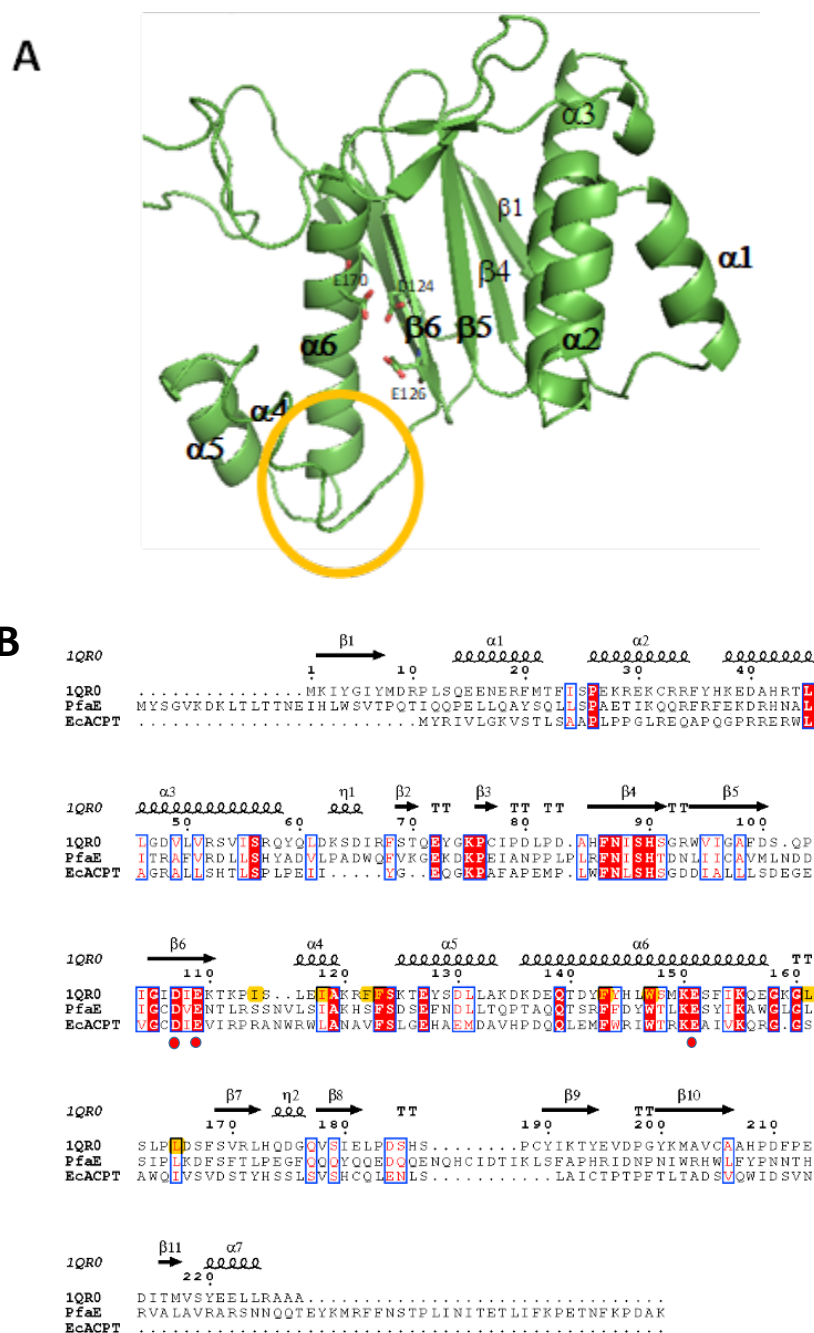

**Figure S8.** (A) Predicted structure of mmPfaE from *M. marina*. mmPfaE structure was modelled by Phyre2 using *Bacillus subtilis* Spf (1QR0) as template. Predicted catalytic residues D124, E126 and E170 are shown. The ACP-PfaE interaction zone is indicated with a yellow circle. (B) Alignment of mmPfaE with homologous proteins. The active site residues responsible for catalysis are highlighted with red dots and the residues responsible for ACP-PfaE interaction are marked in yellow.

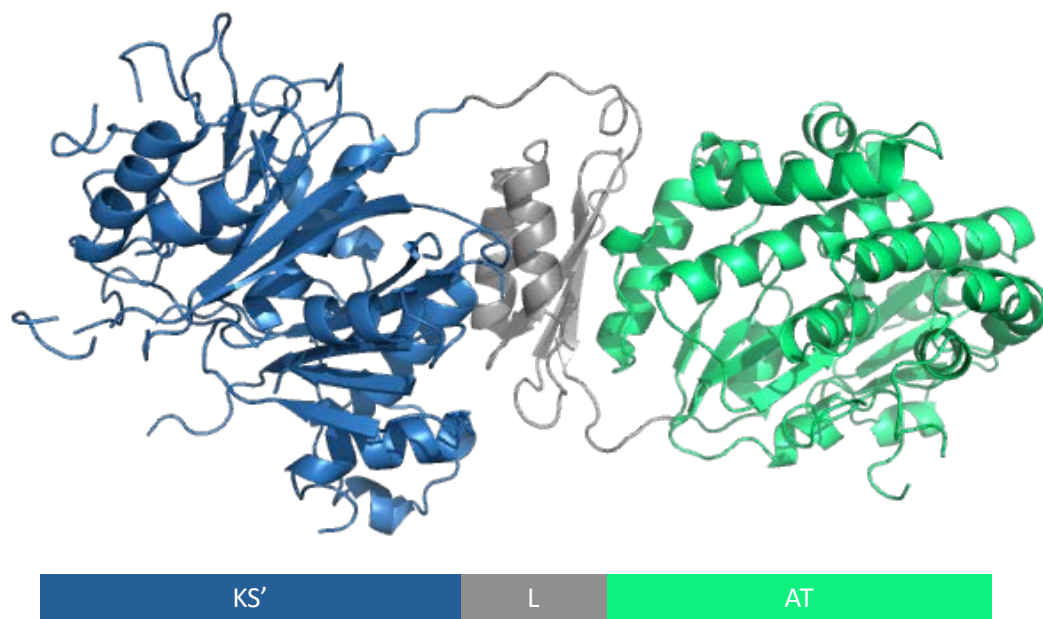

**Figure S9. Predicted structure of mmPfaB from *M. marina*.** A linker (grey) connects the pseudo keto synthase N-terminal domain (blue) and the acyl transferase domain (green).
